# Supplementary material
Source: HighWire-hosted journal article supplement (https://www.cmajopen.ca/highwire/filestream/80797/field_highwire_adjunct_files/0/open-2014-0009-original-submission.pdf)
Supplement: open-2014-0009-original-submission.pdf [file open-2014-0009-original-submission.pdf]

1 **Quetiapine Nation? 300% increase in quetiapine prescriptions by family physicians in Canada**  
2 **from 2005 to 2012.**

3  
4 **Tamara Pringsheim MD MSc<sup>1</sup>, and David M. Gardner BSc Pharm, ACPR, PharmD, MSc<sup>2</sup>**

5  
6 <sup>1</sup>Department of Clinical Neurosciences, University of Calgary, Calgary, AB, Canada

7  
8  
9 <sup>2</sup>Department of Psychiatry and College of Pharmacy, Dalhousie University, Halifax, NS, Canada

10  
11 **Corresponding Author:**

12  
13 Tamara Pringsheim, MD MSc  
14 Alberta Children's Hospital  
15 2888 Shaganappi Trail NW  
16 Calgary AB T3B 6A8  
17 Phone (403) 955-7921  
18 Fax (403) 955-5990  
19 Email [tmprings@ucalgary.ca](mailto:tmprings@ucalgary.ca)  
20  
21  
22  
23

24 **This study was not funded.**

25  
26  
27 Disclosure: The information contained in this publication is derived in whole or in part from data  
28 obtained under license from IMS Health Canada Inc. Source: CompuScript and CDTI audits, 2005-2013  
29 IMS Health Canada Inc. All Rights Reserved. The statements, findings, conclusions, views, and opinions  
30 contained and expressed herein are not necessarily those of IMS Health Canada Inc. or any of its affiliates.  
31  
32  
33  
34  
35  
36  
37  
38  
39  
40  
41  
42  
43  
44  
45  
46  
47  
48  
49  
50  
51  
52  
53  
54  
55  
56  
57  
58  
59  
60

**Abstract**

1  
2  
3  
4  
5 Background: Antipsychotic use has experienced an unprecedented rate of growth in the last decade,  
6  
7 primarily related to non-psychotic indications and off-label use. The increased use of antipsychotics is  
8  
9 concerning due to high rates of metabolic and extrapyramidal side effects, and inadequate monitoring for  
10  
11 these complications.  
12  
13

14  
15  
16  
17 Method: We performed analyses on national antipsychotic use with the IMS Brogan Canadian  
18  
19 CompuScript Database and the Canadian Disease and Treatment Index. We analyzed the number of  
20  
21 dispensed prescriptions for second generation antipsychotics by family physicians and psychiatrists, and  
22  
23 diagnoses associated with recommendations for quetiapine by family physicians and psychiatrists, from  
24  
25  
26  
27 2005 to 2012.  
28  
29  
30  
31

32 Results: Between 2005 and 2012 there was a 300% increase in dispensed prescriptions for quetiapine by  
33  
34 family physicians, from 1.04 million dispensed prescriptions in 2005, to 4.17 million in 2012. In  
35  
36 comparison, dispensed prescriptions by family physicians for risperidone and olanzapine increased by  
37  
38 only 37%. Dispersed prescriptions for quetiapine by psychiatrists increased 141%, from 0.87 million  
39  
40 dispensed prescriptions in 2005, to 2.11 million in 2012. Accounting for 79% of quetiapine  
41  
42 recommendations, the top four diagnoses associated with quetiapine in 2012 were mood disorders,  
43  
44 psychotic disorders, anxiety disorders, and sleep disturbances. A ten-fold increase in quetiapine  
45  
46 recommendations for sleep disturbances was seen over the eight year study period, with almost all  
47  
48 recommendations coming from family physicians.  
49  
50  
51  
52  
53  
54  
55  
56  
57  
58  
59  
60

1 Conclusion: These findings indicate a large and preferential increase in the use of quetiapine over other  
2 antipsychotics in Canada, and that expanded use is mostly due to an increase in its off-label prescribing  
3  
4  
5 by family physicians.  
6  
7  
8  
9  
10  
11  
12  
13  
14  
15  
16  
17  
18  
19  
20  
21  
22  
23  
24  
25  
26  
27  
28  
29  
30  
31  
32  
33  
34  
35  
36  
37  
38  
39  
40  
41  
42  
43  
44  
45  
46  
47  
48  
49  
50  
51  
52  
53  
54  
55  
56  
57  
58  
59  
60

Confidential

## Background

Antipsychotic use has experienced an unprecedented rate of growth in the last decade, primarily related to new, non-psychotic indications and off-label use across all age groups in Canada(1-3). Second-generation antipsychotics (SGAs) are preferred by prescribers primarily because of their lower risk for movement disorders(4). However, usage patterns vary considerably among the SGAs in clinical practice, especially when contrasting olanzapine, which is most commonly used for chronic psychotic disorders, risperidone, with its mixed use in psychosis and in young people with disruptive disorders, and quetiapine, which has become commonplace treatment for mood, anxiety, and sleep problems(1, 5-7). The evidence-base for these expanded uses is often insubstantial or, in the case of quetiapine as a hypnotic, completely inadequate.

Originally indicated for schizophrenia, quetiapine now has Health Canada and US Food and Drug Administration (FDA) indications for the management of bipolar mania and depression as well as for major depressive disorder (MDD)(8, 9). For MDD, it is to be reserved for treatment failures to standard therapies(10) or used as a treatment adjunct(11). It is not indicated for anxiety or sleep disturbances. Regarding its application for approval to treat generalized anxiety disorder, the FDA stated concerns about its long-term metabolic and movement disorders risks and its association with sudden cardiac death(12). The manufacturer retracted its application for an anxiety disorder indication globally several years ago.

Quetiapine and its active metabolite norquetiapine are both potent antihistamines(13). This, possibly among other pharmacological actions, accounts for quetiapine's hypnotic effect and increasing popularity as a sleeping aid when used at lower doses(14, 15). At intermediate doses, putative antidepressant and

1  
2  
3  
4  
5  
6  
7  
8  
9  
10  
11  
12  
13  
14  
15  
16  
17  
18  
19  
20  
21  
22  
23  
24  
25  
26  
27  
28  
29  
30  
31  
32  
33  
34  
35  
36  
37  
38  
39  
40  
41  
42  
43  
44  
45  
46  
47  
48  
49  
50  
51  
52  
53  
54  
55  
56  
57  
58  
59  
60

anxiolytic pharmacological actions become relevant. Norquetiapine and, to a lesser extent, quetiapine are 5-HT<sub>1A</sub> agonists and norquetiapine is a moderately potent re-uptake inhibitor of noradrenaline. However, quetiapine and its several metabolites are pharmacologically diverse and carry risks that make quetiapine a poor choice, based on tolerability and safety concerns and regardless of its efficacy, in the routine management of insomnia, anxiety, and depression(4, 12).

We measured the rise in use of quetiapine and other SGAs among family physicians and psychiatrists and specifically investigated the most common diagnoses associated with quetiapine recommendations, including its rate of use for the treatment of mood, psychotic, and anxiety disorders as well as sleep disturbances.

## Methods

IMS Brogan (IMS) is a proprietary source of pharmacoepidemiologic data. The IMS databases are the only national source for population based data on antipsychotic medications in Canada. Administrative data cannot be used for this purpose because, in most Canadian provinces, administrative records for prescription data are only collected in special population groups, e.g. those covered by publicly funded drug plans, and the extent of coverage differs across provinces. Several national surveys have collected information on medication use (e.g. the National Population Health Survey), but no surveys having an adequate sample size have targeted this specific group.

We performed analyses based on the IMS Brogan Canadian CompuScript Database and the Canadian Disease and Treatment Index (CDTI). The Canadian CompuScript database contains national prescription data collected in pharmacies at the time prescriptions are filled, and records the specialty of the prescribing physician. The data collected from Quebec, Ontario, Alberta, Saskatchewan, Nova Scotia, New

1 Brunswick, PEI and Newfoundland is tagged with a doctor number or name which allows IMS Brogan to  
2 identify the specialty of the prescriber. In British Columbia and Manitoba national estimates are used as a  
3 proxy at the provincial level. National estimates of prescribing by specialty are derived through statistical  
4 methods that maintain the proportion of physicians in each specialty. Approximately 80% of dispensed  
5 prescriptions are reported to IMS. For this study, we analyzed the number of dispensed prescriptions for  
6 quetiapine by family physicians/general practitioners and psychiatrists, as well the number of dispensed  
7 prescriptions for risperidone, olanzapine, aripiprazole, ziprasidone, clozapine, and paliperidone for  
8 comparison purposes. CDTI is a longitudinal national physician panel study. CDTI collects treatment data  
9 from a sample of Canadian office-based physicians (n=652) that comprise a representative sample, of  
10 which 85% to 91% are respondents from the previous quarter. This study identifies usage and treatment  
11 patterns by drug and by physician specialty. Each physician participating in the panel completes a record  
12 of all patient visits during a two-day period per quarter. The nature of each visit, including the age and  
13 gender of the patient, drug recommendation, and the therapeutic indication are recorded. Physicians are  
14 compensated for participation and accuracy. Analyses of the CDTI database allowed us to characterize  
15 the frequency with which physicians recommend antipsychotic medications for adults for specific  
16 diagnoses. For this study, we used the CDTI database to evaluate diagnoses associated with  
17 recommendations for quetiapine by family physicians/general practitioners and psychiatrists.  
18  
19  
20  
21  
22  
23  
24  
25  
26  
27  
28  
29  
30  
31  
32  
33  
34  
35  
36  
37  
38  
39  
40  
41  
42

## 43 **Results**

44 Quetiapine, risperidone and olanzapine are the three most common antipsychotic medications  
45 prescribed by family physicians/general practitioners and psychiatrists. Between 2005 and 2012 there  
46 was a 300% increase in dispensed prescriptions for quetiapine prescribed by family physicians/general  
47 practitioners, from 1.04 million dispensed prescriptions in 2005, to 4.17 million in 2012. In comparison,  
48 dispensed prescriptions prescribed by family physicians/general practitioners for risperidone and  
49 olanzapine increased by only 37% over the same time interval. Dispensed prescriptions for quetiapine  
50  
51  
52  
53  
54  
55  
56  
57  
58  
59  
60

1 from family physicians/general practitioners surpassed prescriptions for the other two medications, with  
2  
3 1.91 million dispensed prescriptions for risperidone and 1.33 million prescriptions for olanzapine in  
4  
5 2012 (see Figure 1).  
6  
7

8  
9  
10 The total number and rate of increase in dispensed prescriptions for quetiapine was much higher for  
11  
12 family physicians/general practitioners compared to psychiatrists. Dispensed prescriptions for  
13  
14 quetiapine by psychiatrists increased 141%, from 0.87 million dispensed prescriptions in 2005, to 2.11  
15  
16 million dispensed prescriptions in 2012. Dispensed prescriptions for risperidone increased by 43%, and  
17  
18 for olanzapine increased 32% over the same time interval (see Figure 2). In 2005, psychiatrists were  
19  
20 prescribing quetiapine, risperidone, and olanzapine at nearly identical rates. By 2012, the use of  
21  
22 quetiapine had approximately doubled the rate of the other two antipsychotics.  
23  
24  
25  
26  
27  
28

29 As estimated from the CDTI, quetiapine recommendations from GPs and psychiatrists increased from  
30  
31 1.15 million in 2005 to 1.92 million in 2012. Accounting for 79% of quetiapine recommendations, the top  
32  
33 four diagnoses associated with quetiapine use in 2012 were (1) mood disorders, (2) psychotic disorders,  
34  
35 (3) anxiety disorders, and (4) sleep disturbances (see Figures 3-6). Quetiapine recommendations for  
36  
37 mood disorders nearly doubled, mostly due to an increase in general practitioner prescribing (Figure 3).  
38  
39 For psychosis usage dropped overall, due to fewer recommendations by psychiatrists (Figure 4).  
40  
41 Recommendations more than doubled for quetiapine in the treatment of anxiety disorders, spurred on  
42  
43 primarily by general practitioner prescribing (Figure 5). A ten-fold increase in quetiapine  
44  
45 recommendations for sleep disturbances was seen over the seven year study period, with almost all  
46  
47 recommendations coming from general practitioners (Figure 6). The number of recommendations grew  
48  
49 disproportionately for women for this indication. In 2005, 51% of the 10,530 recommendations were for  
50  
51 women, whereas in 2012 78% of the 101,580 were for women. The greatest surge in the number of  
52  
53 recommendations of quetiapine for sleep disturbances was between 2011 (66.7% in women) and 2012,  
54  
55  
56  
57  
58  
59  
60

1 in which an additional 32,350 recommendations were observed representing a 47% increase year over  
2 year.  
3  
4  
5  
6

## 7 **Interpretation**

8  
9  
10  
11  
12 These findings indicate a large and preferential increase in the use of quetiapine over other  
13 antipsychotics in Canada. They show that quetiapine's expanded use is mostly due to an increase in its  
14 off-label prescribing by GPs. Our CompuScript analysis demonstrates that over 50% of filled  
15 antipsychotic prescriptions in Canada were for quetiapine in 2012 and that the majority came from  
16 primary care physicians. In 2005, the ratio of prescriptions for quetiapine between family physicians and  
17 psychiatrists approached 1:1. By 2012, it was 2:1.  
18  
19  
20  
21  
22  
23  
24  
25  
26  
27  
28

29 Our analyses of the CDTI data demonstrate how the use of quetiapine has changed over time. The data  
30 suggest that in 2008 the majority of recommendations for quetiapine were for off-label indications. While  
31 there has been a gradual decline in its recommendations for psychosis, other uses have increased  
32 steadily. This trend has been observed by others(16, 17). The 2012 findings indicate that for every 100  
33 recommendations for quetiapine, 43 were for mood disorders, 18 for psychosis, 12 for anxiety disorders,  
34 5 for sleep disturbances, and 22 for other indications. In contrast, recommendations were nearly evenly  
35 split between psychosis and mood disorders in 2005 with fewer than 1 in 1000 recommendations for  
36 sleep disturbance.  
37  
38  
39  
40  
41  
42  
43  
44  
45  
46  
47  
48  
49  
50

51 Quetiapine's rise in off label use preceded its regulatory approval for depression. The FDA granted  
52 approval for quetiapine in the treatment of depression in patients with bipolar disorder in 2006(11).  
53 Health Canada approved quetiapine for bipolar mania and depression in 2008(10). Indications for major  
54 depression were approved by the FDA (as adjunct treatment) and Health Canada (to treat failures to  
55  
56  
57  
58  
59  
60



1 standard therapies) in 2009(10, 11). It is possible that the publication of clinical trials evaluating  
2  
3 quetiapine for the treatment of depression, or knowledge that it was being investigated for this  
4  
5 indication, bolstered its use in the treatment of mood disorders. In their systematic review, Komossa and  
6  
7 colleagues identified 7 blinded, randomized trials published in peer-reviewed journals between 2006 and  
8  
9 2009(18). The findings of this review suggest that quetiapine be reserved for second or third-line therapy  
10  
11 in depression. Numbers needed to treat (NNT) for response, remission, and discontinuation due to  
12  
13 adverse effects approximate 8, 17, and 11, respectively, versus placebo. When used as an add-on to  
14  
15 unsuccessful antidepressant therapy, the NNTs are estimated to be 10, 8, and 12, respectively. The only  
16  
17 direct comparison with an antidepressant involved duloxetine, which may be less effective and less  
18  
19 tolerable than other antidepressants(19), found no between group differences in efficacy but reduced  
20  
21 overall tolerability with quetiapine (i.e., NNT for discontinuation due to adverse effects of 6)(20).  
22  
23  
24  
25  
26  
27  
28

29 Quetiapine's use in anxiety is remarkable and unprecedented for an antipsychotic. While several small  
30  
31 randomized trials were completed and published earlier, the first large RCT of quetiapine for anxiety was  
32  
33 published in a peer-reviewed journal in 2010 followed by four others in the following 2 years. Earlier  
34  
35 versions of these studies were presented at international meetings and were included in a systematic  
36  
37 review(21). While the findings indicate clinical efficacy in generalized anxiety, quetiapine's overall  
38  
39 tolerability was poor. Odds for adverse effect related dropouts were 3.8 and 2.2 times higher with  
40  
41 quetiapine compared to placebo and antidepressant comparators (i.e., paroxetine, escitalopram),  
42  
43 respectively(21-23).  
44  
45  
46  
47  
48  
49  
50

51 Patten and colleagues reported an estimated 108,000 recommendations for tricyclic antidepressants  
52  
53 (TCAs), primarily amitriptyline, and 168,000 recommendations for trazodone for sleep disturbance in  
54  
55 2005(24). In 2012, quetiapine reached approximately the same level of use as the TCAs and, based on  
56  
57 trends observed in the CDTI data, it has now likely exceeded that of the tricyclics and is approaching the  
58  
59  
60

1 rate of use of trazodone for sleep disturbances. The evidence supporting quetiapine as a hypnotic agent is  
2 limited(7). Two randomized polysomnographic studies have been conducted, involving a total of 34  
3 participants, 16 with primary insomnia and 18 as healthy volunteers(25, 26). In the study of 16 subjects  
4 with primary insomnia, baseline characteristics were not balanced with the quetiapine group having  
5 notably worse sleep measures(25). The study showed no difference between treatment groups after 14  
6 days, possibly as a result of these differences at baseline. In a study of 18 volunteers, all participants were  
7 exposed to placebo, quetiapine 25 mg, and quetiapine 100 mg on two consecutive nights with 4 day  
8 intervening washouts(26). Both doses showed advantage in terms of total sleep time (added 30 to 45  
9 minutes) and reduced sleep onset latency under noisy conditions (by 15 to 20 minutes). However, time to  
10 achieve slow wave sleep was delayed with quetiapine 25 mg and 100 mg (by 13 and 30 minutes on  
11 average, respectively) and quetiapine was associated with more periodic limb movements (PLMs):  
12 placebo 34 PLMs, quetiapine 25 mg: 57 PLMs, and quetiapine 100 mg: 155 PLMs). In addition, two  
13 participants were removed due to fainting with quetiapine 100 mg.  
14  
15  
16  
17  
18  
19  
20  
21  
22  
23  
24  
25  
26  
27  
28  
29  
30  
31  
32  
33

34 It is not known, from controlled trials, if quetiapine's sedative effects are sustained over time or if low-  
35 dose use provides a favourable risk-benefit ratio compared to alternative sleep aids in patients with non-  
36 affective insomnia. An open-label, uncontrolled study of 18 primary insomnia patients with a baseline  
37 total sleep time of 6 hours showed an increase of 48 minutes after two weeks and 38 minutes at 6 weeks.  
38 Just over half took 25 mg per night and the rest 50 or 75 mg. Sleep onset and slow wave sleep time were  
39 not significantly improved(14). The relative effectiveness, tolerability, and safety of quetiapine when  
40 compared to other commonly used hypnotics is a matter of speculation as there are no direct  
41 comparisons.  
42  
43  
44  
45  
46  
47  
48  
49  
50  
51  
52  
53  
54  
55

56 Quetiapine and its active metabolite norquetiapine are potent antihistamines, which likely accounts for  
57 much of quetiapine's sedating effect. However, unlike diphenhydramine, the prototypical centrally acting  
58  
59  
60

1 antihistamine, quetiapine and norquetiapine have several, clinically relevant, other pharmacological  
2 actions worth considering. Most importantly, quetiapine is a D<sub>2</sub> antagonist. It has low potency at this  
3 receptor necessitating higher doses to achieve antipsychotic effects. However, like all antipsychotics, it is  
4 a common cause of akathisia and a rare cause of neuroleptic malignant syndrome(4, 27). The risk for  
5 developing a severe movement disorder when used at lower doses (e.g., 25 to 150 mg/day) in the  
6 treatment of anxiety and sleep disturbance has not been sufficiently investigated. It is well recognized for  
7 its ability to exacerbate cardiovascular risk factors including hypertension, dyslipidemia, and obesity,  
8 including when used at lower doses for insomnia(4, 9, 28). Less well recognized are risks of severe  
9 hepatitis, potentially chronic movement disorders, pneumonia, hypothyroidism, and confusion(4, 9, 29-  
10 32). Quetiapine is anticholinergic, as indicated by norquetiapine's affinity for M1 receptors, and can  
11 produce blurred vision among other anticholinergic side effects(9, 13). Relevant to its use in anxiety and  
12 insomnia, quetiapine has been repeatedly associated with withdrawal reactions as well as abuse and  
13 dependence(33, 34).

14  
15  
16  
17  
18  
19  
20  
21  
22  
23  
24  
25  
26  
27  
28  
29  
30  
31  
32  
33  
34 In addition to concerns of over use of quetiapine in treating patients with major depression, anxiety, or  
35 sleep problems, we have concerns about inadequate monitoring of patients of all ages taking quetiapine  
36 and other antipsychotics(4, 35). This issue is most pressing for quetiapine considering its widespread off  
37 label use(36). We recommend that clinicians adhere to published monitoring guidelines when using  
38 quetiapine, whether for approved indications or off-label, regardless of the dose used. Depending on the  
39 patient, these can include vitals, weight, BMI, waist circumference, lipids, fasting glucose and insulin, and  
40 TSH. Moreover, patients should be informed of their treatment options, pharmacological and non-  
41 pharmacological, along with a review of the related potential harms and benefits.  
42  
43  
44  
45  
46  
47  
48  
49  
50  
51  
52  
53  
54  
55  
56  
57  
58  
59  
60

## References

1. Murphy A, Gardner DM, Cooke C, Kisely S, Hughes J, Kutcher SP. Prescribing trends of antipsychotics in youth receiving income assistance: results from a retrospective population database study. *BMC Psychiatry*. 2013;13(1):198.
2. Pringsheim T, Lam D, Patten SB. The pharmacoepidemiology of antipsychotic medications for Canadian children and adolescents. *Journal of Child and Adolescent Psychopharmacology*. 2011;21(6):537-43.
3. Alessi-Severini S, Biscontri RG, Collins DM, Kozyrskyj A, Sareen J, Enns MW. Utilization and costs of antipsychotic agents: a Canadian population-based study, 1996-2006. *Psychiatric Services*. 2008;59(5):547-53.
4. Gardner DM, Teehan M. *Antipsychotics and their Side Effects*. Cambridge: Cambridge University Press; 2011.
5. Alessi-Severini S, Biscontri RG, Collins DM, Sareen J, Enns MW. Ten years of antipsychotic prescribing to children: a Canadian population based study. *Canadian Journal of Psychiatry*. 2012;57(1):52-8.
6. Jing Y, Guo Z, Kalsekar I, Forbes RA, Hebden T, Thase ME. Dosing patterns of aripiprazole and quetiapine for adjunctive treatment of major depressive disorder (2006-2010). *International Clinical Psychopharmacology*. 2013;28(2):87-90.
7. Coe HV, Hong IS. Safety of low doses of quetiapine when used for insomnia. *Annals of Pharmacotherapy*. 2012;46(5):718-22.
8. Seroquel. Product Monograph. United States of America 2013.
9. Seroquel. Product Monograph. Canada 2013.
10. Canada H. Notice of Compliance Information. Ottawa, ON 2012 [cited 2013 Aug 8].

- 1 11. U.S. Food and Drug Administration CfDEaR. N20-639S057 and N22-047S028 quetiapine fumarate  
2 clinical PREA. Silverspring, MD: U.S. Food and Drug Administration; 2013 [cited 2013 August 8].
- 3  
4  
5 12. Kuehn BM. FDA panel issues mixed decision on quetiapine in depression and anxiety. *Journal of*  
6  
7  
8  
9  
10  
11  
12  
13  
14  
15  
16  
17  
18  
19  
20  
21  
22  
23  
24  
25  
26  
27  
28  
29  
30  
31  
32  
33  
34  
35  
36  
37  
38  
39  
40  
41  
42  
43  
44  
45  
46  
47  
48  
49  
50  
51  
52  
53  
54  
55  
56  
57  
58  
59  
60  
20. Cutler AJ, Montgomery SA, Feifel D, Lazarus A, Astrom M, Brecher M. Extended release quetiapine  
fumarate monotherapy in major depressive disorder: a placebo and duloxetine controlled study. *Journal*  
of *Clinical Psychiatry*. 2009;70(4):526-39.
21. Depping AM, Komossa K, Kissling W, Leucht S. Second generation antipsychotics for anxiety  
disorders. *Cochrane Database of Systematic Reviews*. 2010(12):Art. No.: CD008120.

- 1 22. Bandelow B, Chouinard G, Bobes J, Ahokas A, Eggens I, Lui S, et al. Extended release quetiapine  
2 fumarate (quetiapine XR): a once-daily monotherapy effective in generalized anxiety disorder. Data from  
3 a randomized, double blind, placebo- and active-controlled study. *International Journal of*  
4  
5  
6  
7  
8  
9  
10 23. Merideth C, Cutler AJ, She F, Eriksson H. Efficacy and tolerability of extended release quetiapine  
11 fumarate monotherapy in the acute treatment of generalized anxiety disorder: a randomized, placebo  
12 controlled and active controlled study. *International Clinical Psychopharmacology*. 2012;27(1):40-54.  
13  
14  
15  
16  
17 24. Patten SB, Esposito E, Carter B. Reasons for antidepressant prescriptions in Canada.  
18  
19  
20  
21  
22 25. Tassniyom K, Paholpak S, Tassniyom S, Kiewyoo J. Quetiapine for primary insomnia: a double  
23  
24  
25  
26  
27 26. Cohrs S, Rodenbeck A, Gaun Z, Pohlmann K, Jordan W, Meier A, et al. Sleep promoting properties of  
28  
29  
30  
31  
32 27. Gortney JS, Fagan A, Kissack JC. Neuroleptic malignant syndrome secondary to quetiapine. *Annals*  
33  
34  
35  
36  
37 28. Cates ME, Jackson CW, Feldman JM, Stimmel AE, Woolley TW. Metabolic consequences of using  
38  
39  
40  
41  
42  
43 29. Naharci MI, Karadurmus N, Demir O, Bozoglu E, Ak M, Doruk H. Fatal hepatotoxicity in an elderly  
44  
45  
46  
47  
48  
49 30. Traynor K. FDA advisors wary of expanding quetiapine use: clinicians air concerns about  
50  
51  
52  
53  
54 31. Jeste DV, Jin H, Golshan S, Mudaliar S, Glorioso D, Fellows I, et al. Discontinuation of quetiapine  
55  
56  
57  
58  
59  
60

- 1 32. Ramaswamy S, Siddiqui Z, Saharan S, Gabel TL, Bhatia SC. Quetiapine-induced hypothyroidism.  
2  
3 Journal of Psychiatry and Neuroscience. 2005;30(1):57.  
4
- 5 33. Murphy D, Bailey K, Stone M, Wirshing WC. Addictive potential of quetiapine. American Journal of  
6  
7 Psychiatry. 2008;165(7):918.  
8
- 9  
10 34. Kim DR, Staab JP. Quetiapine discontinuation syndrome. American Journal of Psychiatry.  
11  
12 2005;162(5):1020.  
13
- 14  
15 35. Pringsheim T, Panagiotopoulos C, Davidson J, Ho J. Evidence-based recommendations for  
16  
17 monitoring safety of second generation antipsychotics in children and youth. Journal of the Canadian  
18  
19 Academy of Child and Adolescent Psychiatry. 2011;20(3):218-33.  
20
- 21  
22 36. McKean A, Monasterio E. Off-label use of atypical antipsychotics: cause for concern? CNS Drugs.  
23  
24 2012;26(5):383-90.  
25  
26  
27  
28  
29  
30  
31  
32  
33  
34  
35  
36  
37  
38  
39  
40  
41  
42  
43  
44  
45  
46  
47  
48  
49  
50  
51  
52  
53  
54  
55  
56  
57  
58  
59  
60

Figure 1

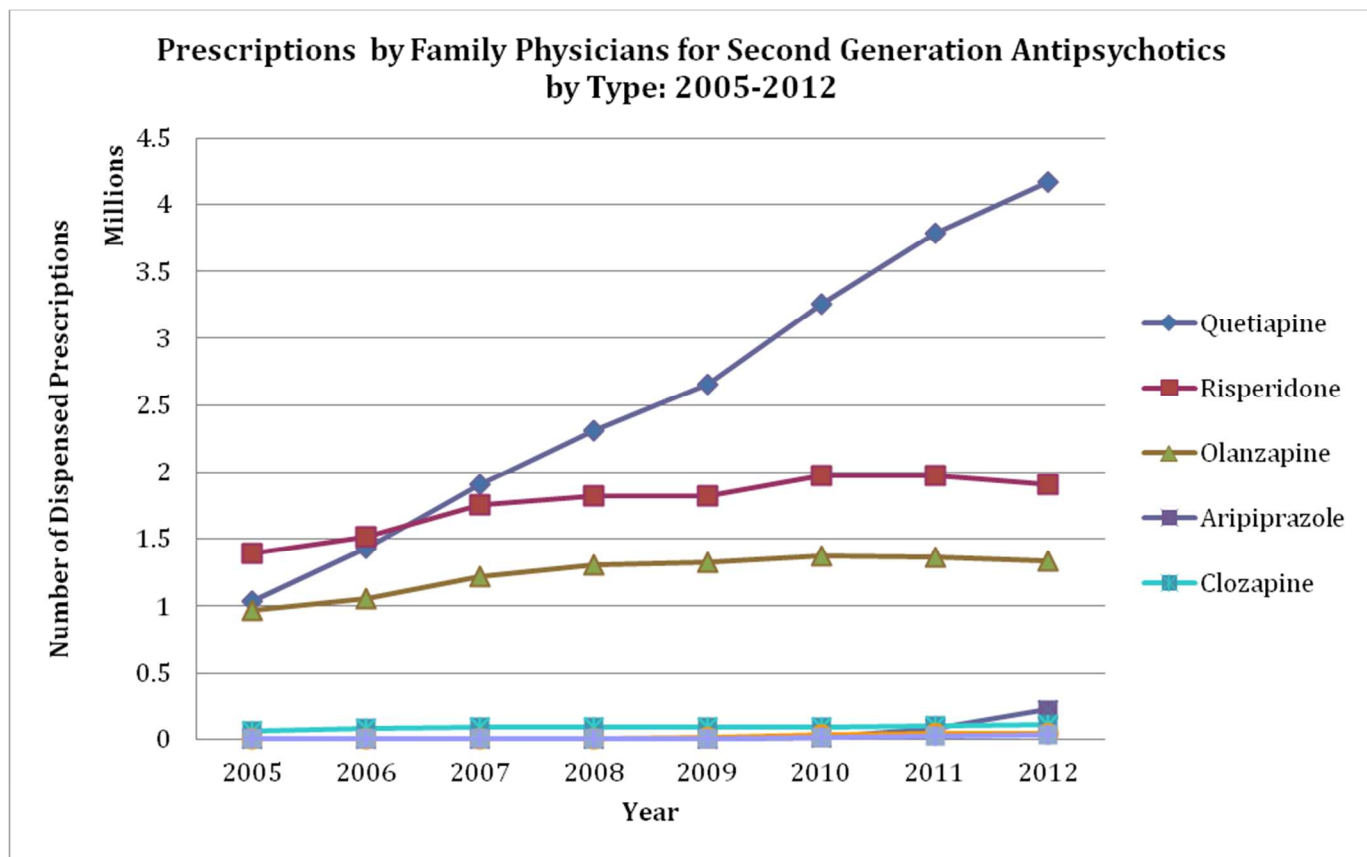

Source: IMS Brogan Compuscript

dential



Figure 2

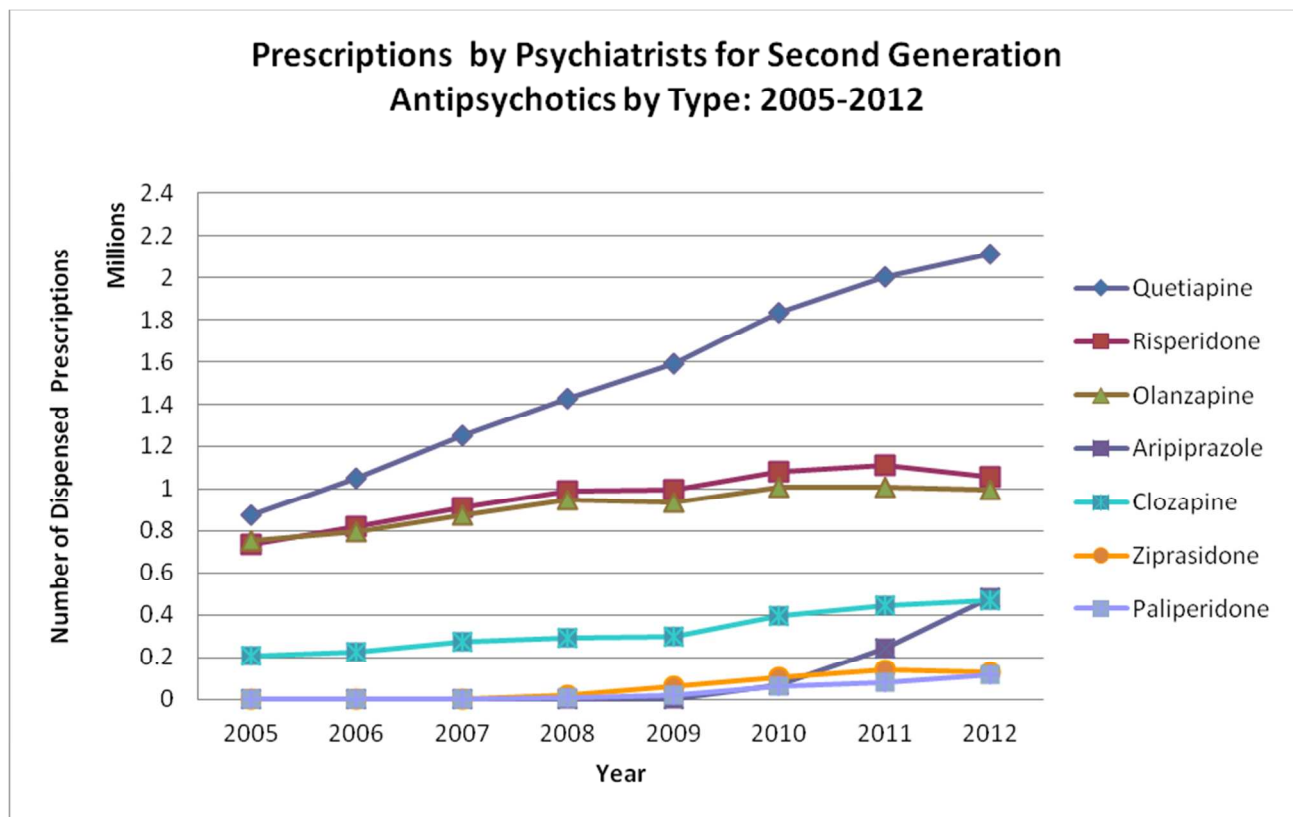

Source: IMS Brogan Compuscript

Figure 3

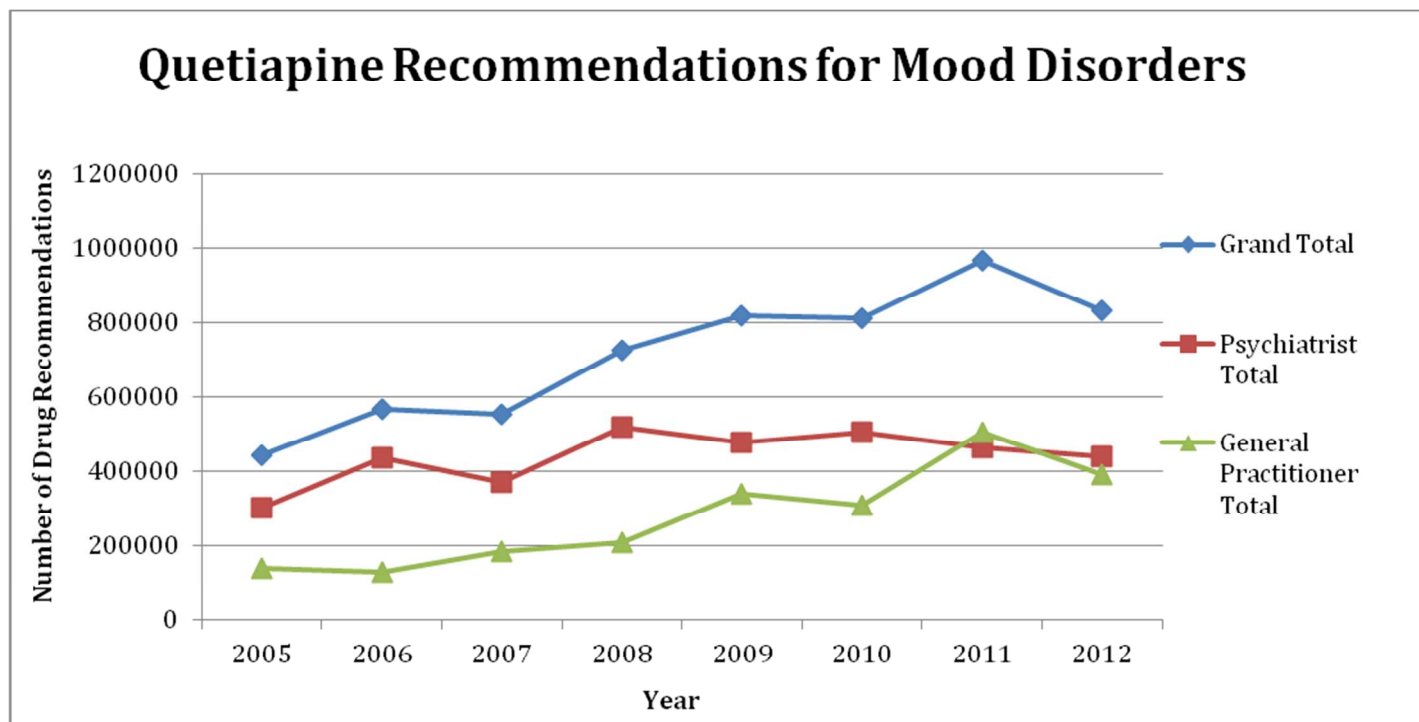

Source: IMS Brogan Canadian Disease and Therapeutic Index

Figure 4

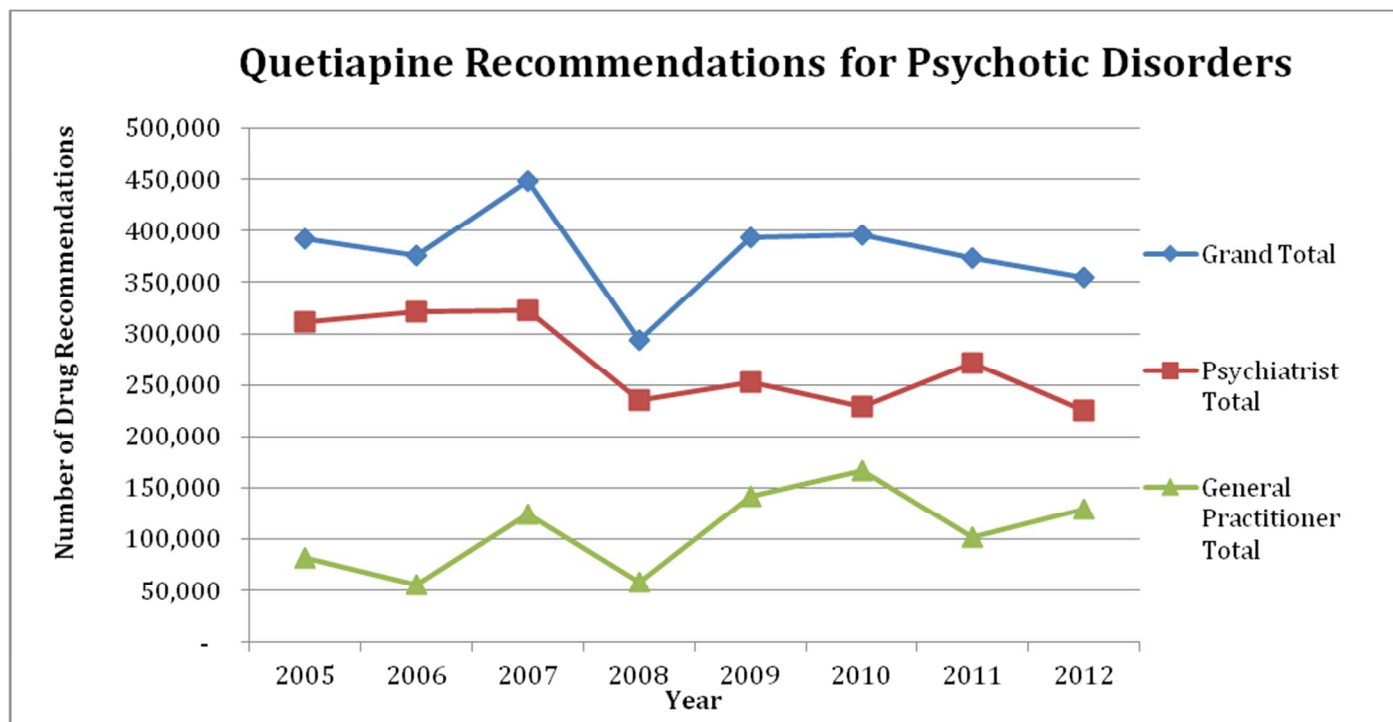

Source: IMS Brogan Canadian Disease and Therapeutic Index

Figure 5

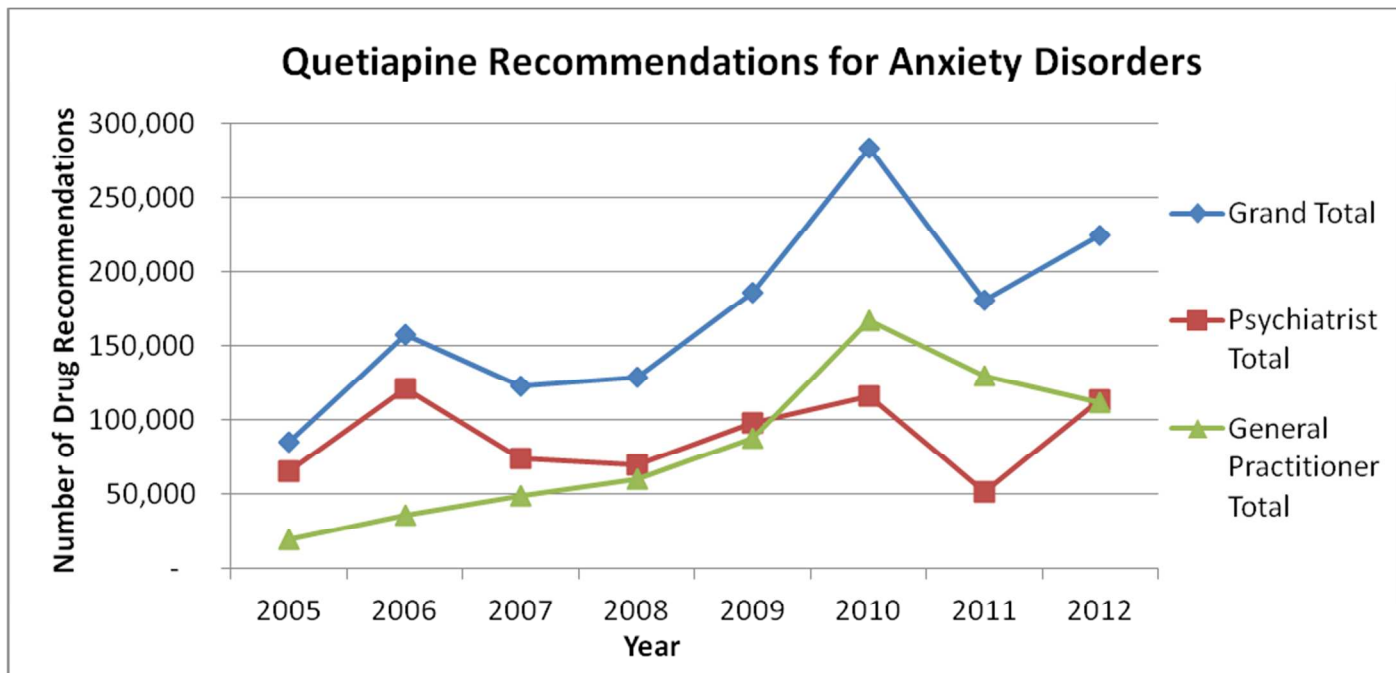

Source: IMS Brogan Canadian Disease and Therapeutic Index

Confidential

Figure 6

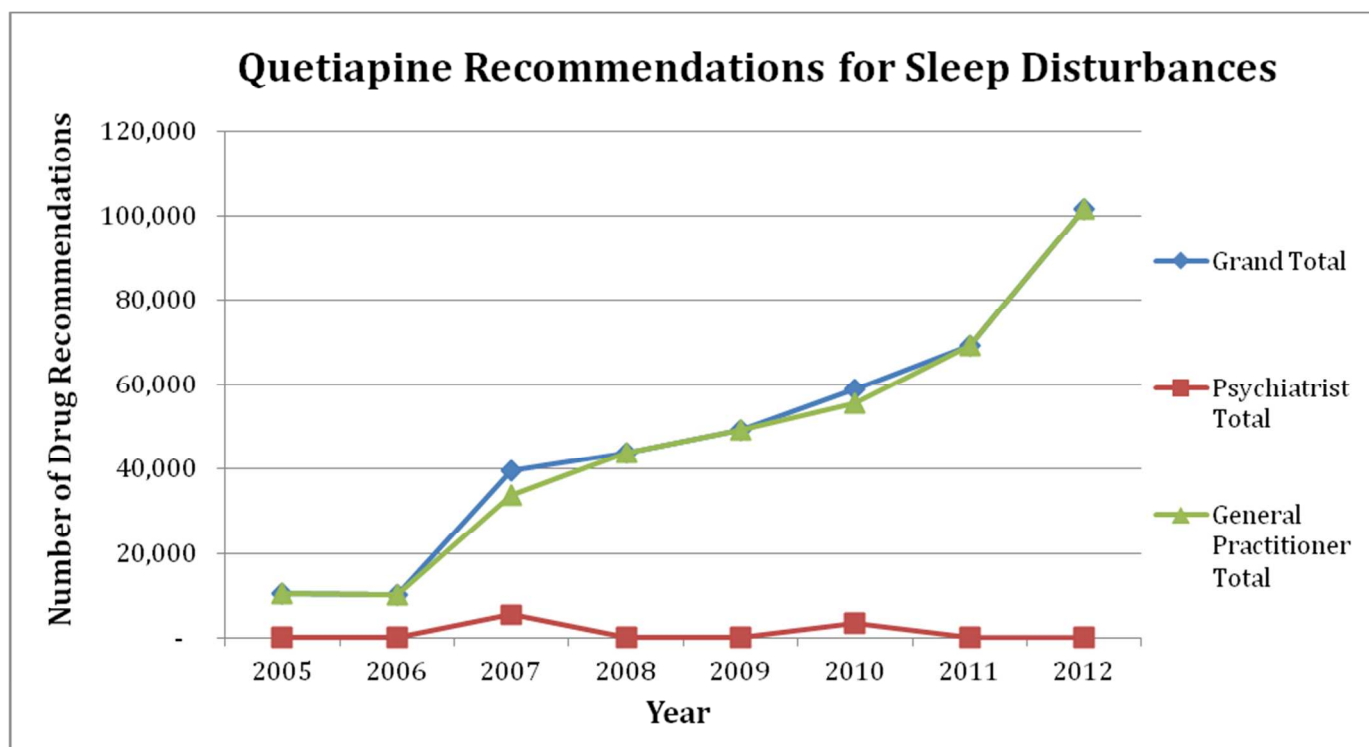

Source: IMS Brogan Canadian Disease and Therapeutic Index
